# Supplementary material
Source: Springer Nature journal article supplement (https://www.springermedizin.de/resource/supplementary/12885_2006_613_MOESM3_ESM.pdf/9469896)

a) Age curvature effects

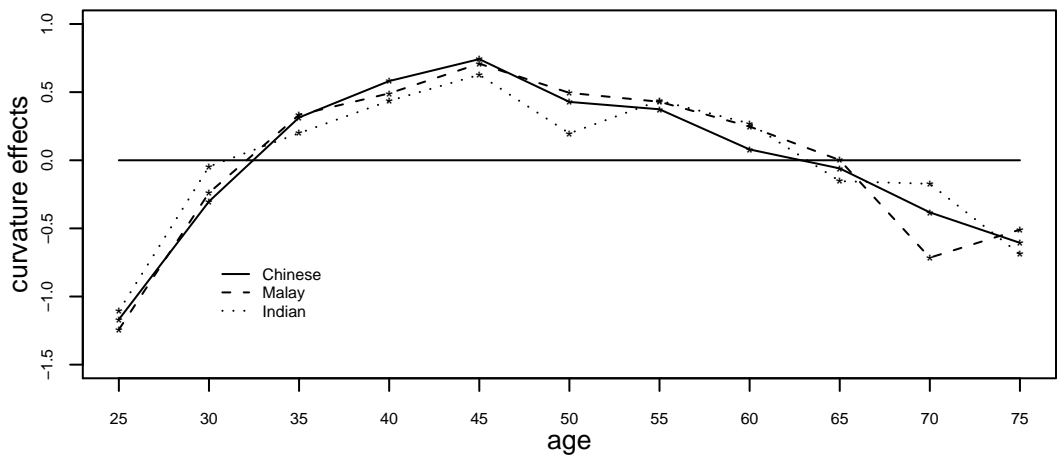

b) Period curvature effects

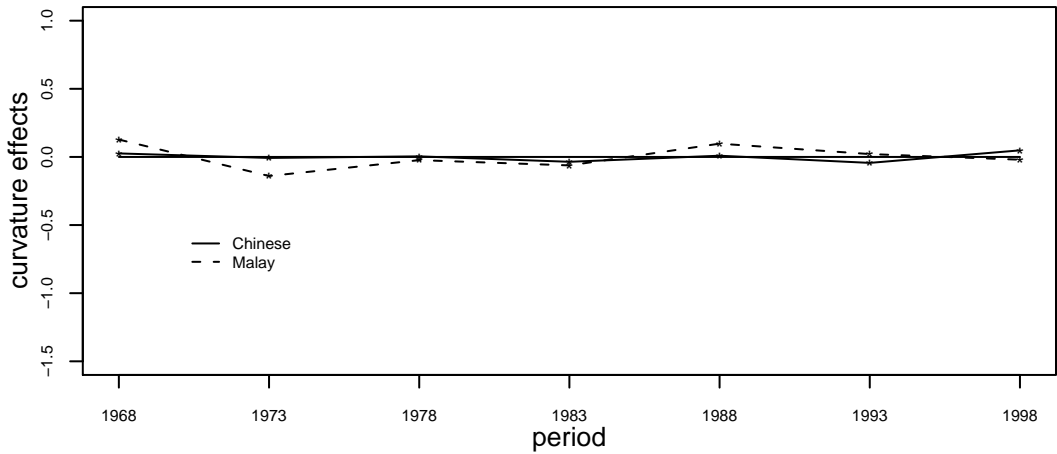

c) Cohort curvature effects

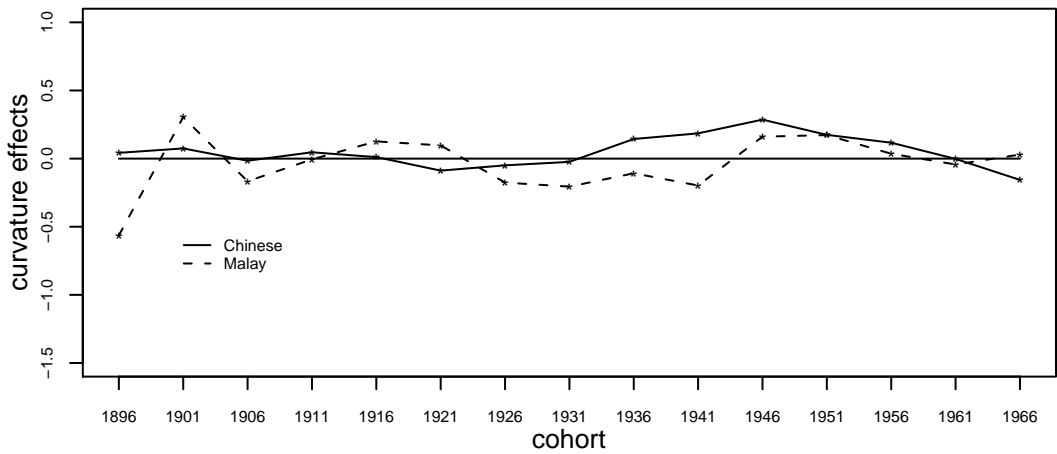

Supplement: MOESM3 [file 9469896]
